# Supplementary material for: Bioinspired fiber-like porous Cu/N/C electrocatalyst facilitating electron transportation toward oxygen reaction for metal–air batteries
Source: Royal Society of Chemistry journal article supplement (doi:10.1039/c8nr03981j), 2018-01-01
Supplement: c8nr03981j1.pdf [file c8nr03981j1.pdf]

## Supporting Information

# Bioinspired Fiber-like Porous Cu/N/C electrocatalyst Facilitating Electrons Transportation toward oxygen reaction for Metal-air Batteries

Qiyu Wang, Zhian Zhang\*, Mengran Wang, Fangyang Liu, Liangxing Jiang, Bo  
Hong, Jie Li, Yanqing Lai\*

<sup>a</sup> School of Metallurgy and Environment, Central South University, Changsha  
410083, China

\* Corresponding author: E-mail address: zhangzhian@csu.edu.cn (Z. Zhang);  
laiyanqingcsu@163.com (Y. Lai).

---

\*Corresponding author.

E-mail address: zhangzhian@csu.edu.cn (Z. Zhang); laiyanqingcsu@163.com (Y. Lai).

**Supporting Information Contains:**

**S1. Characterization of the materials**

**S2. Electrochemical measurements**

**S3. The Koutechy-Levich (K-L) equation**

**S4. XPS full spectra of CuNC (MOF).**

**S5. ORR chronoamperometric response of CuNC (MOF), CuNC NPs and Pt/C catalysts at a constant voltage of 0.67 V vs RHE.**

**S6. EDX results of CuNC NPs**

**S7. XPS full spectra of CuNC NPs.**

**S8. Electrical conductivity of different samples measured by the four-probe method**

## **S1. Characterization of the materials**

A field-emission scanning electron microscopy (FESEM, FEI Quanta-200) and a scanning transmission electron microscopy (STEM, MIRA3 TESCAN) were taken to run morphology tests. X-ray diffraction (XRD, Rigaku 3014) measurements were investigated with Cu-K $\alpha$  radiation. N<sub>2</sub> adsorption/desorption curve were taken with a Quantachrome instrument (Quabrsorb SI-3MP) at 77 K. Expressions for chemical states of the carbon, nitrogen and sulfur in the material were performed by X-ray photoelectron spectroscopy (XPS, ESCA LAB 250Xi).

## **S2. Electrochemical measurements**

Briefly, catalysts, acetylene black, and polytetrafluoroethylene emulsion (PTFE, 60 wt %) were blended in a mass ratio of 6:1:3 to make a catalytic layer rolling with a gas diffusion layer and a current collector as the air electrode. The aluminum-air battery model was a self-made electrochemical cell. The Al-air battery we applied was assembled with aluminium alloy plate as anode, aqueous electrolyte which contained 6.00 M KOH and 0.01 M Na<sub>2</sub>SnO<sub>3</sub>, 0.50 mM In(OH)<sub>3</sub>, 7.50 mM ZnO as anticorrosives and made air electrode as cathode in a home-made cell model. The discharge curve of aluminum-air battery was recorded at a constant current density of 50 mA cm<sup>-2</sup>. The rate performance of aluminum-air battery was measured at different current densities from 50 mA cm<sup>-2</sup> to 200 mA cm<sup>-2</sup>.

### S3. The Koutechy-Levich (K-L) equation

The K-L equation was applied to calculate the average electron transfer number of made samples.

The K-L equation is given as follows:

$$\frac{1}{j} = \frac{1}{j_k} + \frac{1}{B\omega^{0.5}}$$

where  $j_k$  is the kinetic current and  $\omega$  is the electrode rotating rate.  $B$  could be determined from the slope of the K-L plots based on the Levich equation as follows:

$$B = 0.2nF(DO_2)^{2/3}\nu^{-1/6}C_{O_2}$$

where  $n$  represents the number of electrons transferred per oxygen molecule,  $F$  is the Faraday constant ( $F = 96485 \text{ C mol}^{-1}$ ),  $D_{O_2}$  is the diffusion coefficient of  $O_2$  in 0.1 M KOH ( $1.9 \times 10^{-5} \text{ cm}^2 \text{ s}^{-1}$ ),  $\nu$  is the kinetic viscosity ( $0.01 \text{ cm}^2 \text{ s}^{-1}$ ), and  $C_{O_2}$  is the bulk concentration of  $O_2$  ( $1.2 \times 10^{-6} \text{ mol cm}^{-3}$ ). The constant 0.2 is adopted when the rotation speed is expressed in rpm.

#### S4. XPS full spectra of CuNC (MOF).

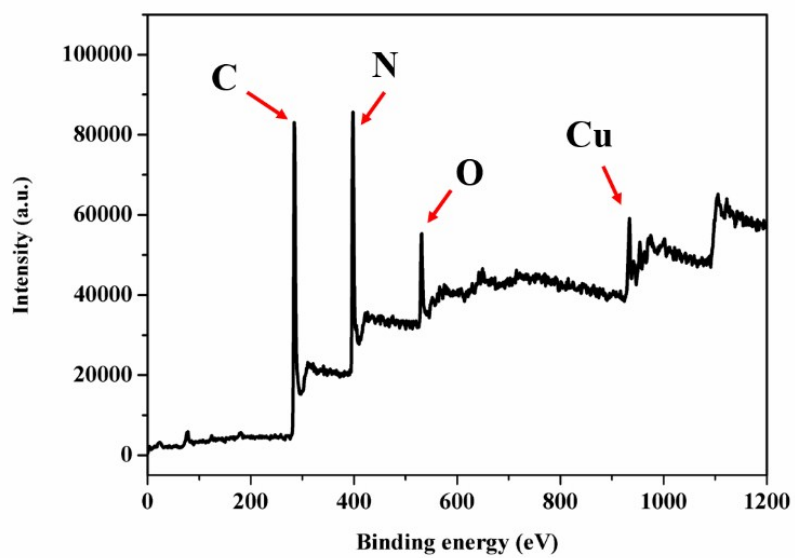

Figure S1. XPS full spectra of CuNC (MOF).

**S5. ORR chronoamperometric response of CuNC (MOF), CuNC NPs and Pt/C catalysts at a constant voltage of 0.67 V vs RHE.**

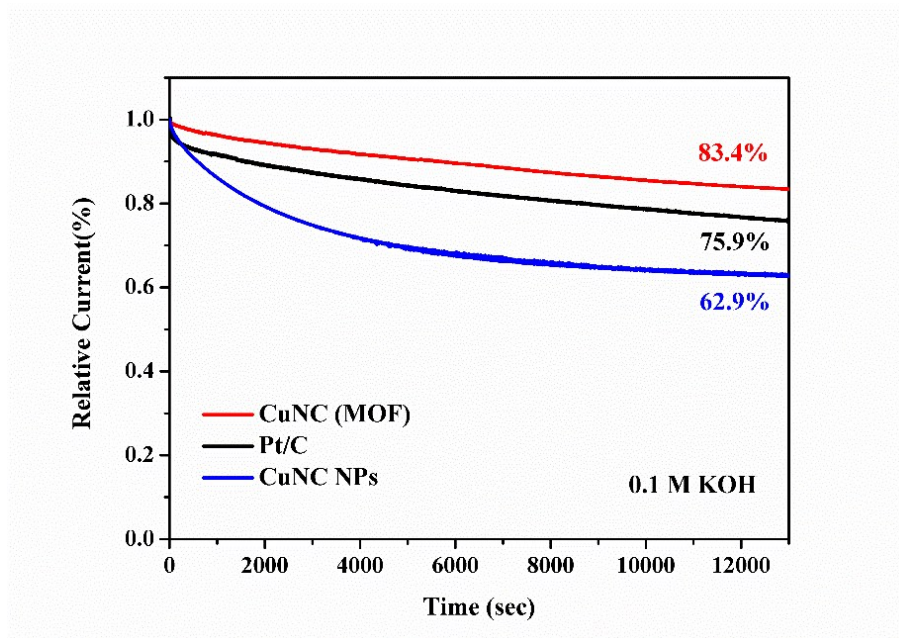

Figure S2. ORR chronoamperometric response of CuNC (MOF), CuNC NPs and Pt/C catalysts at a constant voltage of 0.67 V vs RHE.

## S6. EDX results of CuNC NPs

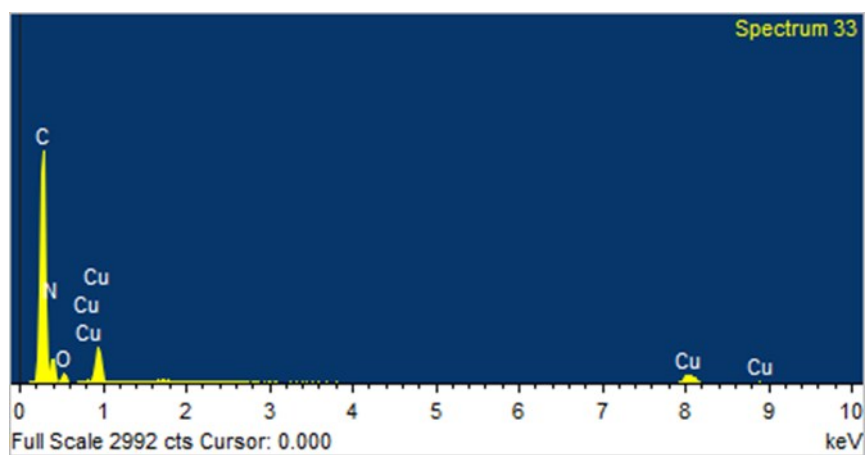

Figure S3. EDX results of CuNC NPs.

### S7. XPS full spectra of CuNC NPs.

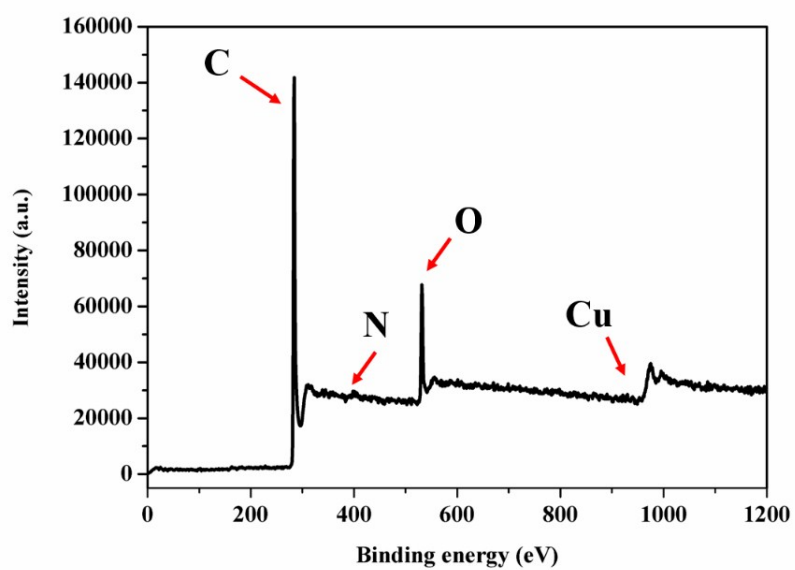

Figure S4. XPS full spectra of CuNC NPs.



**S8. Electrical conductivity of different samples measured by the four-probe method**

Table S1 Electrical conductivity of different samples measured by the four-probe method

| Sample                            | CuNC NPs | CuNC (MOF) |
|-----------------------------------|----------|------------|
| Conductivity (S m <sup>-1</sup> ) | 4.29     | 16.1       |
